# Supplementary material for: Ascophyllum nodosum Based Extracts Counteract Salinity Stress in Tomato by Remodeling Leaf Nitrogen Metabolism
Source: MDPI journal article supplement (doi:10.3390/plants10061044), 2021-05-21
Supplement: s1 [file s1]

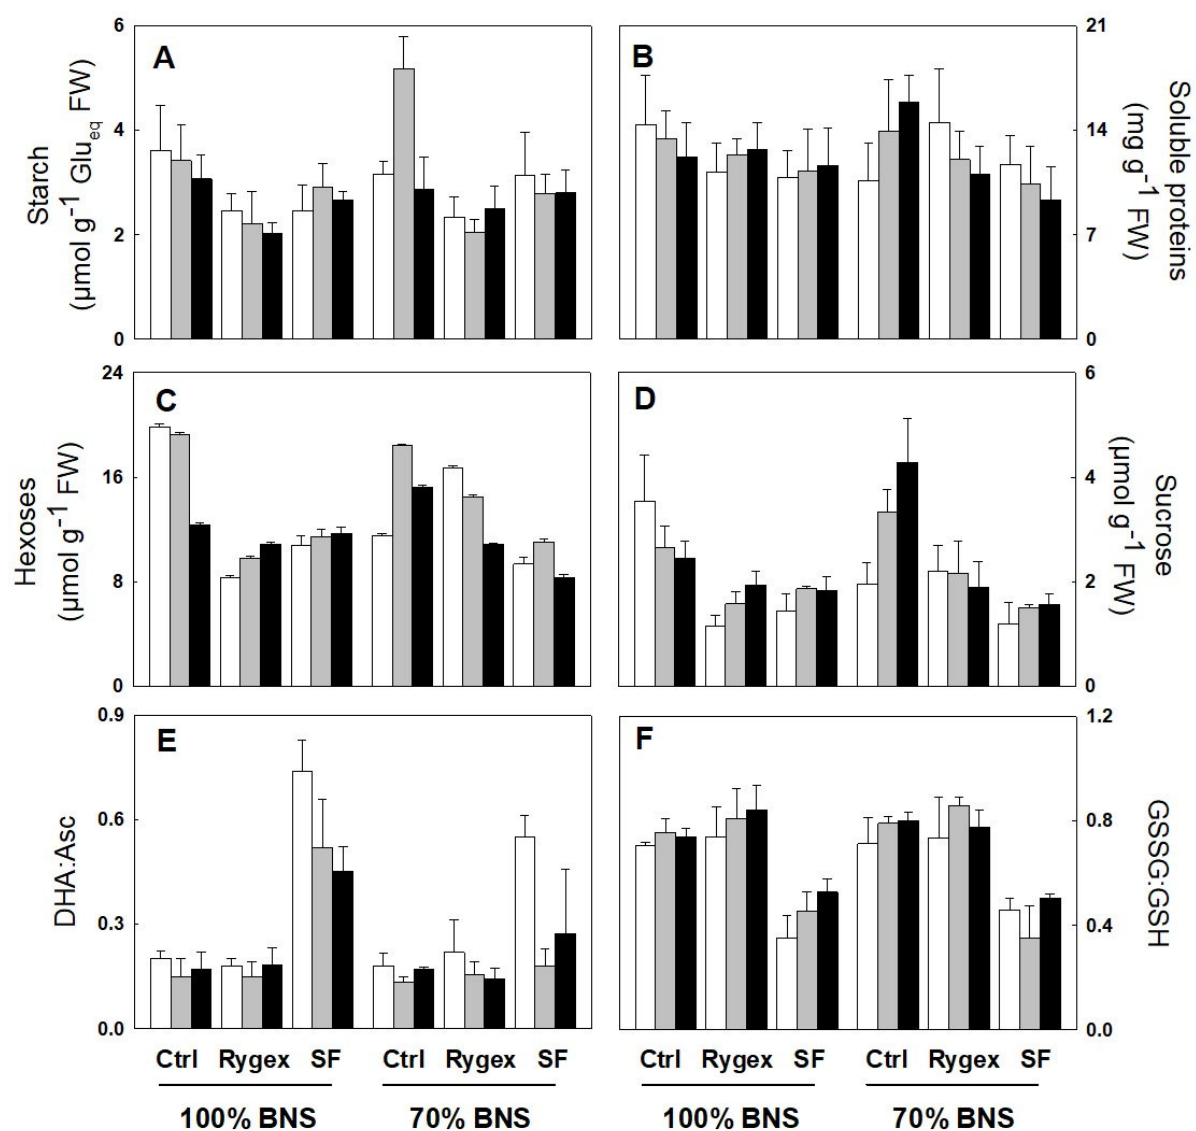

**Supplemental figure 1.** Leaf content of starch (A), soluble proteins (B), hexoses (C), sucrose (D) dehydroascorbate to ascorbate ratio (DHA:Asc) (E) and oxidized to reduced glutathione ratio (GSSG:GSH) (F). Bar colors and experimental design are as in Figure 1. The values are mean  $\pm$  S.D. (n = 3). Significance of the main factors (nutrient solution, biostimulant and salinity) and their interactions is shown in Tables 3 and 4.
